# Supplementary material for: Model-Guided Metabolic Rewiring for Gamma-Aminobutyric Acid and Butyrolactam Biosynthesis in Corynebacterium glutamicum ATCC13032
Source: MDPI journal article supplement (doi:10.3390/biology11060846), 2022-05-31
Supplement: s1 [file s1]

## Supplementary Materials

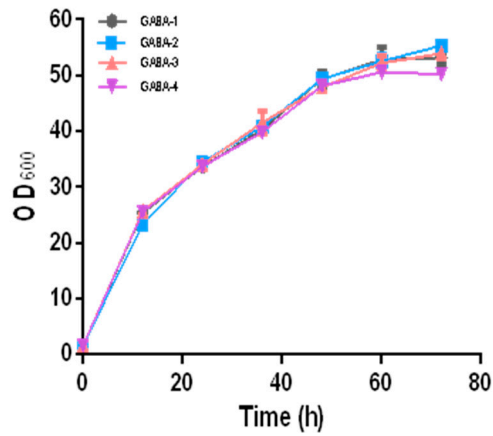

**Figure S1.** The growth profiles of engineered *C. glutamicum* strains harboring pXMJ19-*P<sub>tuf</sub>*-*guaB-gadM* in shake flask cultivations.

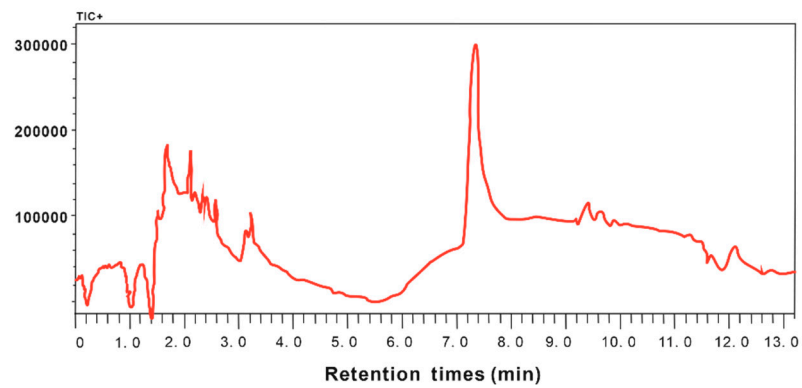

**Figure S2.** The analysis of butyrolactam in the shake flask cultivation using HPLC-MS. Time profiles of fermentation sample are shown.

**Table S1. Strains and plasmids used in this study.**

| Strains                                        | Characteristics                                                                                                                                                                  | Source                 |
|------------------------------------------------|----------------------------------------------------------------------------------------------------------------------------------------------------------------------------------|------------------------|
| <b><i>E. coli</i></b>                          |                                                                                                                                                                                  |                        |
| EC135                                          | TOP10 $\Delta dcm::FRTrecA^+\Delta dam::FRT$ , genotype of R-M systems:                                                                                                          | (Zhang et. al., 2012)  |
| BL21(DE3)                                      | <i>mcrA</i> $\Delta(mrr-hsdRMS-mcrBC)\Delta dcm::FRT\Delta dam::FRT$                                                                                                             |                        |
| <i>C. glutamicum</i>                           | F <sup>-</sup> <i>ompT gal dcm lon hsdS<sub>B</sub>(r<sub>B</sub><sup>-</sup> m<sub>B</sub><sup>-</sup>)</i> $\lambda$ (DE3)                                                     | Novagen                |
| ATCC 13032                                     | wild-type, biotin-auxotrophic                                                                                                                                                    | ATCC                   |
| GABA-1                                         | 13032 harboring pXMJ19- <i>P<sub>tuf</sub>-guaB-gadM</i>                                                                                                                         | This study             |
| GABA-2                                         | WT- <i>P<sub>tuf</sub>-acn</i> harboring pXMJ19- <i>P<sub>tuf</sub>-guaB-gadM</i>                                                                                                | This study             |
| GABA-3                                         | WT- <i>P<sub>tuf</sub>-acn-P<sub>tuf</sub>-icd</i> harboring pXMJ19- <i>P<sub>tuf</sub>-guaB-gadM</i>                                                                            | This study             |
| GABA-4                                         | WT- <i>P<sub>tuf</sub>-acn-P<sub>tuf</sub>-icd</i> $\Delta$ <i>sucCD</i> harboring pXMJ19- <i>P<sub>tuf</sub>-guaB-gadM</i>                                                      | This study             |
| GABA-5                                         | WT- <i>P<sub>tuf</sub>-acn-P<sub>tuf</sub>-icd</i> $\Delta$ <i>sucCD</i> $\Delta$ <i>gabDT</i> harboring pXMJ19- <i>P<sub>tuf</sub>-guaB-gadM</i>                                | This study             |
| GABA-6                                         | WT- <i>P<sub>tuf</sub>-acn-P<sub>tuf</sub>-icd</i> $\Delta$ <i>sucCD</i> $\Delta$ <i>gabDT</i> $\Delta$ <i>gabP::potE</i> harboring pXMJ19- <i>P<sub>tuf</sub>-guaB-gadM</i>     | This study             |
| BLM-0                                          | 13032 harboring pXMJ19                                                                                                                                                           | This study             |
| BLM-1                                          | WT- <i>P<sub>tuf</sub>-acn-P<sub>tuf</sub>-icd</i> $\Delta$ <i>sucCD</i> harboring pXMJ19- <i>P<sub>tuf</sub>-guaB-gadM-act</i>                                                  | This study             |
| BLM-2                                          | WT- <i>P<sub>tuf</sub>-acn-P<sub>tuf</sub>-icd</i> $\Delta$ <i>sucCD</i> $\Delta$ <i>gabDT</i> harboring pXMJ19- <i>P<sub>tuf</sub>-guaB-gadM-act</i>                            | This study             |
| BLM-3                                          | WT- <i>P<sub>tuf</sub>-acn-P<sub>tuf</sub>-icd</i> $\Delta$ <i>sucCD</i> $\Delta$ <i>gabDT</i> $\Delta$ <i>gabP::potE</i> harboring pXMJ19- <i>P<sub>tuf</sub>-guaB-gadM-act</i> | This study             |
| <b>Plasmids</b>                                |                                                                                                                                                                                  |                        |
| pK18 <i>mobsacB</i>                            | Mobilizable vector, allows for selection of double crossover in <i>C. glutamicum</i> , <i>Kan<sup>r</sup></i>                                                                    | (Schafer et al., 1994) |
| pK18 <i>mobsacB-P<sub>tuf</sub>-acn</i>        | pK18 <i>mobsacB</i> derivate carrying <i>P<sub>tuf</sub>-acn</i> replacement                                                                                                     | (Zhang et al., 2017)   |
| pK18 <i>mobsacB-P<sub>tuf</sub>-icd</i>        | pK18 <i>mobsacB</i> derivate carrying <i>P<sub>tuf</sub>-icd</i> replacement                                                                                                     | This study             |
| pK18 <i>mobsacB-<math>\Delta</math>sucCD</i>   | pK18 <i>mobsacB</i> derivate carrying <i>sucCD</i> deletion                                                                                                                      | (Zhang et al., 2019)   |
| pK18 <i>mobsacB-<math>\Delta</math>gabDT</i>   | pK18 <i>mobsacB</i> derivate carrying <i>gabDT</i> deletion                                                                                                                      | This study             |
| pK18 <i>mobsacB</i> $\Delta$ <i>gabP::potE</i> | pK18 <i>mobsacB</i> derivate carrying <i>gabP</i> deletion and <i>potE</i> integration                                                                                           | This study             |
| pXMJ19                                         | Shuttle vector (Cm <sup>r</sup> <i>P<sub>tac</sub> lacI<sup>q</sup> pBL1 oriV<sub>C. glutamicum</sub> pK18 oriV<sub>E. coli</sub></i> )                                          | (Jakoby et al., 1999)  |
| pXMJ19- <i>gadB</i>                            | pXMJ19 derivate carrying <i>P<sub>tac</sub>-gadB</i>                                                                                                                             | This study             |
| pXMJ19- <i>gad</i>                             | pXMJ19 derivate carrying <i>P<sub>tac</sub>-gad</i>                                                                                                                              | This study             |
| pXMJ19- <i>gadM</i>                            | pXMJ19 derivate carrying <i>P<sub>tac</sub>-gadM</i>                                                                                                                             | This study             |
| pXMJ19- <i>P<sub>tuf</sub>-gadM</i>            | pXMJ19 derivate carrying <i>P<sub>tuf</sub>-gadM</i>                                                                                                                             | This study             |
| pXMJ19- <i>P<sub>tuf</sub>-tsf-gadM</i>        | pXMJ19 derivate carrying <i>P<sub>tuf</sub>-tsf-gadM</i>                                                                                                                         | This study             |
| pXMJ19- <i>P<sub>tuf</sub>-gsi-gadM</i>        | pXMJ19 derivate carrying <i>P<sub>tuf</sub>-gsi-gadM</i>                                                                                                                         | This study             |
| pXMJ19- <i>P<sub>tuf</sub>-guaB-gadM</i>       | pXMJ19 derivate carrying <i>P<sub>tuf</sub>-guaB-gadM</i>                                                                                                                        | This study             |
| pXMJ19- <i>P<sub>tuf</sub>-guaB-gadM-act</i>   | pXMJ19 derivate carrying <i>P<sub>tuf</sub>-guaB-gadM-act</i>                                                                                                                    | This study             |
| pET-28a                                        | Kan <sup>r</sup> ; expression vector with an N-terminal hexahistidine affinity tag                                                                                               | Novagen                |
| pET-28a- <i>act</i>                            | pET-28a derivate carrying <i>act</i> gene                                                                                                                                        | This study             |

**Table S2. Primers used in this study.**

| Primers | Sequence (5'-3')                                                | Note                                                                                        |
|---------|-----------------------------------------------------------------|---------------------------------------------------------------------------------------------|
| WZ4128  | GCTTGCATGCCTGCAGGTCGACATGGAAGATGTTACATGCTGT<br>ACGGT            | <i>gadB</i> amplification to construct<br>pXMJ19- <i>gadB</i>                               |
| WZ4129  | GAGCTCGGTACCCGGGGATCCTCAGTGGGTGAAGCCGTAGGTTT<br>TGT             |                                                                                             |
| WZ4132  | TAAGCTTGCATGCCTGCAGGTCGACATGGATAAGAAGCAAGTA<br>ACGGATTTAAGGT    | <i>gad</i> amplification to construct<br>pXMJ19- <i>gad</i>                                 |
| WZ4133  | AATTCGAGCTCGGTACCCGGGGATCCTCAGGTATGTTTAAAGCT<br>GTTCTGTTGGGCAAT |                                                                                             |
| WZ4134  | TAAGCTTGCATGCCTGCAGGTCGACATGGATAAGAAGCAAGTA<br>ACGGATTTAAGGT    | <i>gadM</i> amplification to construct<br>pXMJ19- <i>gadM</i>                               |
| WZ4135  | AATTCGAGCTCGGTACCCGGGGATCCTCAGTGATCGCTGAGATA<br>TTTCAGGGAAGCT   |                                                                                             |
| WZ4136  | AATTAAGCTTGCATGCCTGCAGGTCGACATGGATAAGAAGCAA<br>GTAACGGAT        | <i>gadM</i> amplification to construct                                                      |
| WZ4137  | AATTAAGCTTGCATGCCTGCAGGTCGACATGGATAAGAAGCAA<br>GTAACGGAT        | pXMJ19- <i>P<sub>tuf</sub></i> - <i>gadM</i>                                                |
| WZ4138  | GTCGTATCCCACTACCGAGATTGGCCGTTACCCTGCGAATGT                      | <i>P<sub>tuf</sub></i> amplification to construct                                           |
| WZ4139  | GTCGACCTGCAGGCATGCAAGCTTAATTTGTATGTCCTCCTGGAC<br>TTCGT          | pXMJ19- <i>P<sub>tuf</sub></i> - <i>gadM</i>                                                |
| WZ4141  | TGCGGATGTTAAGAAGGAGGAATAAATGGATAAGAAGCAAGTA<br>ACGGAT           | <i>gadM</i> amplification to construct<br>pXMJ19- <i>P<sub>tuf</sub></i> - <i>tsf-gadM</i>  |
| WZ4137  | AATTAAGCTTGCATGCCTGCAGGTCGACATGGATAAGAAGCAA<br>GTAACGGAT        |                                                                                             |
| WZ4142  | AATTAAGCTTGCATGCCTGCAGGTCGACATGGCGAACTACACCG<br>CTGCGG          | <i>tsf</i> amplification                                                                    |
| WZ4143  | TTATTCCTCCTTCTTAACATCCGCAGCGGTGTAGTTCGCCAT                      |                                                                                             |
| WZ4144  | AATAACAAAATAAGGAGGATTTACATATGAATGGATAAGAAGC<br>AAGTAACGGAT      | <i>gadM</i> amplification to construct<br>pXMJ19- <i>P<sub>tuf</sub></i> - <i>gsi-gad</i>   |
| WZ4137  | AATTAAGCTTGCATGCCTGCAGGTCGACATGGATAAGAAGCAA<br>GTAACGGAT        |                                                                                             |
| WZ4145  | AATTAAGCTTGCATGCCTGCAGGTCGACATGGCAGACAATAAC<br>AAA              | <i>gsi</i> amplification                                                                    |
| WZ4146  | TTCATATGTAAATCCTCCTTATTTTGTTATTGTCTGCCAT                        |                                                                                             |
| WZ4147  | ATCGCCCAGTAAAGGAGGAATAAATGGATAAGAAGCAAGTAA<br>CGGAT             | <i>gadM</i> amplification to construct<br>pXMJ19- <i>P<sub>tuf</sub></i> - <i>guaB-gadM</i> |
| WZ4137  | AATTAAGCTTGCATGCCTGCAGGTCGACATGGATAAGAAGCAA<br>GTAACGGAT        |                                                                                             |
| WZ4148  | AAGGAGGATCGCCCCGTAATGAGCCTTCAGACAAATCATC                        | <i>guaB</i> amplification                                                                   |
| WZ4149  | TTATTCCTCCTTTACTGGGCGATGATTTGTCTGAAGGCTCAT                      |                                                                                             |
| WZ4150  | CCGGAATTCAAATCTGATTCTTTGCA                                      |                                                                                             |

| Primers | Sequence (5'-3')                                          | Note                                                           |
|---------|-----------------------------------------------------------|----------------------------------------------------------------|
| WZ4151  | TTCGCAGGGTAACGGCCACTTCATTATCCTAACAGTAC                    | Replacement of <i>acn</i> promoter with <i>P<sub>tuf</sub></i> |
| WZ4152  | GTACTGTTAGGATAATGAAGTGGCCGTTACCCTGCGA                     |                                                                |
| WZ4153  | AGTCACAGTGAGCTCCATTTCTATCCTCCTTTTGTATGTCCTCCTG            |                                                                |
| WZ4154  | ATACAAAAGGAGGATAGAAATGGAGCTCACTGCCT                       |                                                                |
| WZ4155  | CCCAAGCTTTGGTGGTGTGGGAGTCG                                |                                                                |
| WZ4158  | ATGTGCTGCAAGGCGATTAA                                      |                                                                |
| WZ4159  | TATGCTTCCGGCTCGTATGT                                      | Replacement of <i>icd</i> promoter with <i>P<sub>tuf</sub></i> |
| WZ4160  | TTGCATGCCTGCAGGTCGACGCGGTGTGGGAACCTCTTAA                  |                                                                |
| WZ4161  | GAGCCCATCAACCAAGGAGACTCATGGCTAAGATCATCTGGAC               |                                                                |
| WZ4162  | GAGTCTCCTTGGTTGATGGGCTCTGTATGTCCTCCTGGACTTC               |                                                                |
| WZ4163  | ACTGTATTCTAGGTAGCTGAACAAAATGGCCGTTACCCTGCGAA<br>T         |                                                                |
| WZ4164  | TTTTGTTTACGCTACCTAGAATACAGTGTTCTACTAATTGCTGGCG<br>CCTA    |                                                                |
| WZ4165  | ATTCGAGCTCGGTACCCGGGGATCCATGAAACCGCAGCACCCG<br>CAAT       | <i>sucCD</i> knockout                                          |
| WZ4166  | TGCATCCATGGTTGCAACGTT                                     |                                                                |
| WZ4167  | AACCGCAGCACCCGCAATCGCGCGCATCCTCGAA                        |                                                                |
| WZ4176  | ACAGCTATGACATGATTACGAATTCTGTAAAGACGCAGAAGG<br>CTCT        |                                                                |
| WZ4177  | TCAGTAATAATCACGCACAGTGTGTCCTCATCAATACCAGTGAG              |                                                                |
| WZ4178  | CACTGTGCGTGATTATTACTGA                                    |                                                                |
| WZ4179  | CCTGCAGGTCGACTCTAGAGGATCCAGTGCCTTCTGAACCTGTC<br>AC        | <i>gadDT</i> knockout                                          |
| WZ4180  | GTCCTGCGCACAGATGAATACTCT                                  |                                                                |
| WZ4181  | GCTGAGCACCACGGATCCAAT                                     |                                                                |
| WZ4182  | TTGTAAAACGACGGCCAGTGCCACGATGGCTACTGCACCACCC<br>AAAT       |                                                                |
| WZ4183  | AGCTCATGTGTGGTTCCTCCTGTGAGGTGAGATACA                      |                                                                |
| WZ4184  | GGAGGAACCACACATGAGCTGTCCGGTGAATAACCCGAAGGAA               |                                                                |
| WZ4185  | CGAGCTCGGTACCCGGGGATCCAATGGGTGGAACACGATCAGG<br>T          | <i>potE</i> integration                                        |
| WZ4186  | TTGTAAAACGACGGCCAGTGCCACGATGGCTACTGCACCACCC<br>AA         |                                                                |
| WZ4187  | GGTATTTATGTCAACACCGCCAGTTTTTTCCTTCGGGTATTACCC<br>GGA      |                                                                |
| WZ4188  | TGGCGGTGTTGACATAAATACCACT                                 |                                                                |
| WZ4189  | TTAACCGTGTTTATTTTTCAGTTCAAAGCGT                           |                                                                |
| WZ4190  | ACGCTTTGAACTGAAAAATAAACACGGTTAATCACTTCCTGTTG<br>TGGCTGCCT |                                                                |
| WZ4191  | AATTCGAGCTCGGTACCCGGGGATCCCTCTTCTAGCGCTTCACC<br>ACCAG     |                                                                |

| Primers | Sequence (5'-3')                                              | Note                                                                                                             |
|---------|---------------------------------------------------------------|------------------------------------------------------------------------------------------------------------------|
| WZ4192  | ATGCCTGCAGGTCGACTCTAGAAAAGGAGGAACTTATGAAAC<br>GTCCGCTGGAAGGTA | <i>act</i> amplification to construct<br>pXMJ19- <i>P<sub>tuf</sub></i> - <i>guaB</i> - <i>gadM</i> - <i>act</i> |
| WZ4193  | TCCGCCAAAACAGCCAAGCTGAATTCGAGCTCTTAGATAACGTT<br>TTTCTCTTCCA   |                                                                                                                  |
| WZ867   | CGTACTGCTGAAGGCTCTT                                           | RT-PCR for <i>rpoB</i> gene                                                                                      |
| WZ868   | TTTGCTACACCATCGGACT                                           |                                                                                                                  |
| WZ981   | ACCTACACCGACGACGCTGTTTCCG                                     | RT-PCR for <i>acn</i> gene                                                                                       |
| WZ982   | GTTGTCAGCTTCGACGCCGCCTTCA                                     |                                                                                                                  |
| WZ983   | TTCGTATGATCGGTTCCGCACAGGC                                     | RT-PCR for <i>gltA</i> gene                                                                                      |
| WZ984   | GTCGCCACCGTGGTTGCTCTTGATG                                     |                                                                                                                  |
| WZ985   | ACCGTTATCGAAGACTGCCGCAAGA                                     | RT-PCR for <i>icd</i> gene                                                                                       |
| WZ986   | TGAACCACACCGTCTGCTTCGATGC                                     |                                                                                                                  |
| WZ987   | CCAAAGCCAACCCAGGCAGAGCAGA                                     | RT-PCR for <i>kgd</i> gene                                                                                       |
| WZ988   | GCGGAGTCCATCAGTGGGATAAGTG                                     |                                                                                                                  |
| WZ989   | TATCCTGCTGGTCGCATTGGTTCTG                                     | RT-PCR for <i>sucCD</i> gene                                                                                     |
| WZ990   | AAGGAGTTGAAGCCGCCAACGAGGT                                     |                                                                                                                  |
| WZ991   | CAGGCTTCCACTCCCTCAACTACGG                                     | RT-PCR for <i>aceA</i> gene                                                                                      |
| WZ992   | AGCTGCCTTGAACCTACGGTTCTGC                                     |                                                                                                                  |
| WZ993   | CGCAACATTCTCACCATTCCAACCG                                     | RT-PCR for <i>aceB</i> gene                                                                                      |
| WZ994   | CACCGTGCTCAACCCAGCGCACAAC                                     |                                                                                                                  |

## References

1. Zhang, G.; Wang, W.; Deng, A.; Sun, Z.; Zhang, Y.; Liang, Y.; Che, Y.; Wen, T., A mimicking-of-DNA-methylation-patterns pipeline for overcoming the restriction barrier of bacteria. *PLoS Genet* **2012**, *8*, (9), e1002987.
2. Schafer, A.; Tauch, A.; Jager, W.; Kalinowski, J.; Thierbach, G.; Puhler, A., Small mobilizable multi-purpose cloning vectors derived from the *Escherichia coli* plasmids pK18 and pK19: selection of defined deletions in the chromosome of *Corynebacterium glutamicum*. *Gene* **1994**, *145*, (1), 69-73.
3. Zhang, Y.; Cai, J.; Shang, X.; Wang, B.; Liu, S.; Chai, X.; Tan, T.; Zhang, Y.; Wen, T., A new genome-scale metabolic model of *Corynebacterium glutamicum* and its application. *Biotechnol Biofuels* **2017**, *10*, 169.
4. Zhang, Y.; Zhang, Y.; Shang, X.; Wang, B.; Hu, Q.; Liu, S.; Wen, T., Reconstruction of tricarboxylic acid cycle in *Corynebacterium glutamicum* with a genome-scale metabolic network model for trans-4-hydroxyproline production. *Biotechnol Bioeng* **2019**, *116*, (1), 99-109.
5. Jakoby, M.; Ngouoto-Nkili, C.; Burkovski, A., Construction and application of new *Corynebacterium glutamicum* vectors. *Biotechnology Techniques* **1999**, *13*, (6), 437-441.
